# Supplementary material for: Oligomerization and cyclization reactions of acetylene
Source: Royal Society of Chemistry journal article supplement (doi:10.1039/b412585a), 2004-12-24
Supplement: b412585a.doc [file b412585a.doc]

Table S1. Partial Identification of Eluents

| Peak No. | Retention Time (min) | Identification | Source |
| --- | --- | --- | --- |
| 1 | 2.06 | Ethane | Tertiary |
| 2 | 3.65 | Ethylene | Partially primary |
| 3 | 9.17 | Propylene | Secondary and tertiary |
| 4 | 12 | Acetylene | Reactant |
| 5 | 21.64 | 1,3-butadiene | Partially primary |
| 6 | 21.98 | Propyne | Tertiary |
| 7 | 24.5 | Vinylacetylene | Primary |
| 8 | 25.09 | Cyclopentadiene | Partially primary |
| 9 | 27.52 | C5H6 | Partially primary |
| 10 | 28.06 | 1,3-cyclohexadiene | Partially primary |
| 11 | 28.37 | C5H6 | Partially primary |
| 12 | 28.52 | 1,4-cyclohexadiene | Partially primary |
| 13 | 29.8 | Benzene | Primary |
| 14 | 32.15 | C4H2 | Partially primary |
| 15 | 34.14 | C6H6 | Partially primary |
| 16 | 36.19 | C6H6 | Partially primary |
| 17 | 39.93 | Toluene | Secondary |
| 18 | 48.22 | C6H6 | Partially primary |
| 19 | 61.7 | p-xylene | Secondary |
| 20 | 64.31 | m-xylene | Secondary |
| 21 | 73.01 | o-xylene | Partially primary |
| 22 | 85.25, 16.03* | Styrene | Partially primary |
| 23 | 33.95* |  | Secondary |
| 24 | 62.62* |  | Secondary |
| 25 | 76.08* | Naphthalene | Secondary |

* Retention times on a Porapak Q column, other retention times were obtained on an alumina column.

Fig. S1. Dependence of concentrations of six light products, X, on the residence times at 937 K and 202 Torr;, C5H6(27.52’),, 1,3-cyclohexadiene;, C5H6(28.37’); , 1,4-cyclohexadiene;, C4H2; and , C6H6(48.22’); lines are least-square fits of eqn. (E1) to the data.

Fig. S2. Dependence of the concentrations of four heavy products, X, on the residence times at 970 K and 200 Torr; , styrene;, C10(34’);, C10(63’);, naphthalene; lines are least-squares fits of equation (E1). Retention times for the C10 products were obtained on the Porapak column.

Parameters were obtained by fitting equation E1 to the data.

Table S2. The rates, *b*  108 mol L-1 s-1, of formation of twelve products from primary reactions obtained by fitting yields of various products to equation (E6-1).

| T (K) | | | 971 | 970 | | 971 | | 970 | | | 937 | 895 | 854 | |  |
| --- | --- | --- | --- | --- | --- | --- | --- | --- | --- | --- | --- | --- | --- | --- | --- |
|  | P (Torr) | 104 | | | 203 | | 302 | | 403 | 202 | | 302 | | 402 | |
|  | i.d.(mm) | 3.96 | | | 1.96 | | 1.96 | | 0.969 | 3.96 | | 3.96 | | 3.96 | |
|  | Ethylene | 5.7±0.5 | | | 24.7±0.8 | | 78±2 | | 169±7 | 11.0±0.4 | | 11.9±0.8 | | 9.7±0.9 | |
|  | 1,3-butadiene | 1.3±0.1 | | | 5.8±0.4 | | 20.1±0.8 | | 42±2 | 2.4±0.2 | | 2.6±0.2 | | 1.8±0.2 | |
|  | cyclopentadiene | 4.9±0.5 | | | 19±2 | | 58.4±0.6 | | 142±13 | 21.7±0.2 | | 6.7±0.8 | | 7.6±0.9 | |
|  | C5H6 (27.52’) | * | | | 2.2±0.2 | | 5.3±0.8 | | 13.4±0.9 | 1.07±0.04 | | 1.08±0.02 | | 0.88±0.03 | |
|  | 1,3-cyclohexadiene | * | | | 1.4±0.3 | | 2.6±0.4 | | 5.9±0.4 | 0.215±0.009 | | 0.32±0.03 | | 0.29±0.04 | |
|  | C5H6 (28.37’) | * | | | * | | 1.5±0.2 | | 3.1±0.2 | 0.27±0.03 | | 0.26±0.01 | | 0.179±0.009 | |
|  | 1,4-cyclohexadiene | 0.8±0.1 | | | * | | 2.3±0.6 | | 6.9±0.8 | 0.40±0.07 | | 0.28±0.07 | | 0.20±0.02 | |
|  | C4H2 | * | | | 0.6±0.1 | | 1.1±0.4 | | 8±2 | * | | 0.4±0.2 | | 0.5±0.2 | |
|  | C6H6 (34’) | 15.4±0.6 | | | 62±5 | | 135±8 | | 209±12 | 26±1 | | 17.9±0.7 | | 8.5±0.3 | |
|  | C6H6 (36’) | 2.5±0.8 | | | 10.5±0.2 | | 24.7±0.7 | | 35±1 | 4.0±0.1 | | 2.4±0.6 | | 0.66±0.02 | |
|  | C6H6 (48.22’) | * | | | 14±2 | | 23±5 | | * | 4.0±0.5 | | 5.7±0.9 | | 5.8±0.9 | |
|  | Styrene | * | | | 178±2 | |  | |  |  | |  | |  | |

* There was insufficient data to reliably obtain the missing rates.
